# Supplementary material for: The Role of Dectin-1 Signaling in Altering Tumor Immune Microenvironment in the Context of Aging
Source: PubMed Central journal article supplement (PMC8100664; doi:10.3389/fonc.2021.669066), 2021-04-22
Supplement: DataSheet_1.pdf [file DataSheet_1.pdf]

# Supplementary figures

Fig.S1

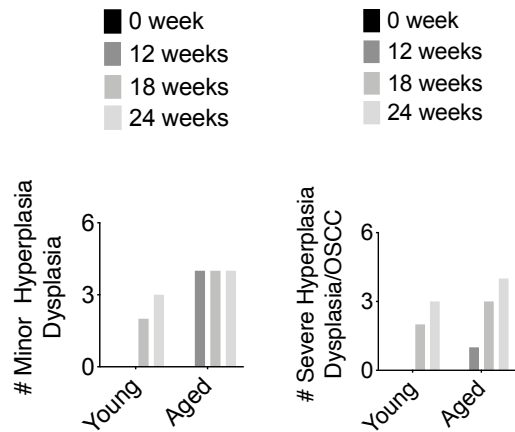

**Fig.S1. Aged mice have earlier incidence of dysplasia and more severe progression of carcinogenesis compared to young mice.** Mice were administered with 4-NQO as in Fig.1. Bar graphs showing the number of mice with hyperplasia/dysplasia in the group of 4 mice.

Fig.S2

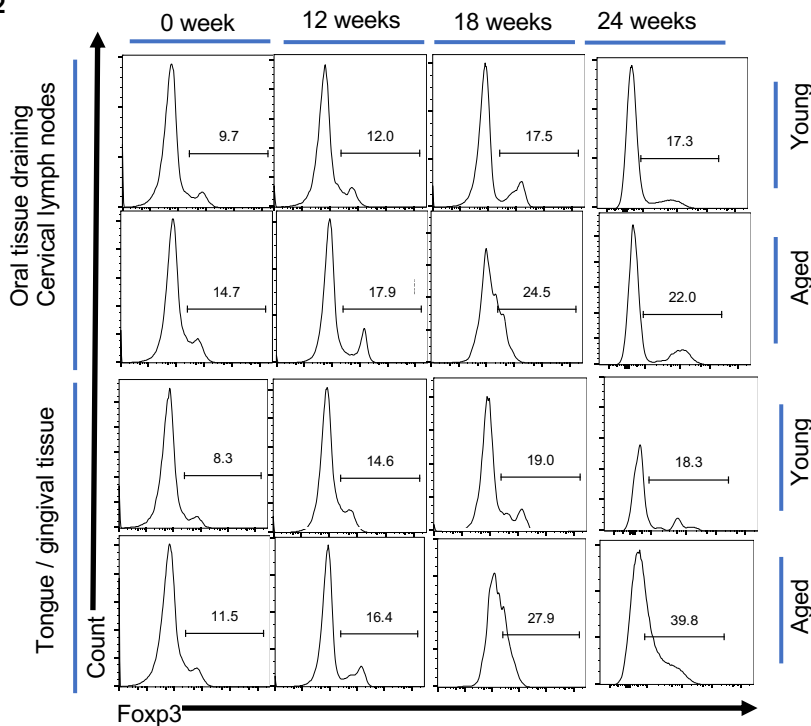

**Fig.S2. 4-NQO treatment increases the proportions of CD4<sup>+</sup>T<sub>regs</sub> during early stages of carcinogenesis in mice. Aged mice have higher proportions of CD4<sup>+</sup>T<sub>regs</sub> compared to young mice, before and after treatment.** 4-NQO was administered in drinking water (50 ug/ml) to mice (n=9/young or aged group) for 0,12, or 18 weeks. Samples were processed for flow cytometry. Contour plots gated on CD3<sup>+</sup>CD4<sup>+</sup> lymphocyte singlets after dead cell exclusion.

Fig.S3

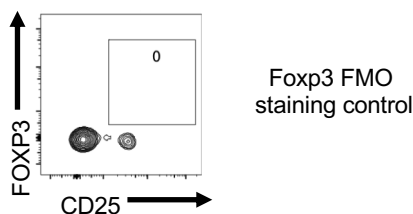

**Fig. S3. FOXP3 FMO staining.** Human oral tissue samples were obtained, processed for flow cytometry and stained with all the antibodies in the panel except FOXP3. Contour plots gated on CD3<sup>+</sup>CD4<sup>+</sup> lymphocyte singlet cells after dead cell exclusion.

**Fig.S4**

- △ Contralateral normal tissue cytobrush
- Tumor lesion cytobrush
- ▼ Resected tumor

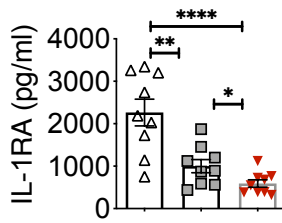

**Fig.S4. IL-1RA levels are diminished in OSCC tumors.** Human oral tissue samples were obtained either by cytobushing or by excision under an approved IRB protocol. The single cell suspensions were restimulated with PMA/Ionomycin for 4 hours and cell supernatants were used for IL-1RA ELISA.

**Fig.S5**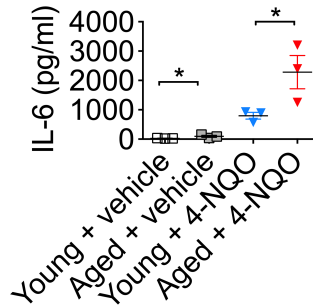

**Fig.S5. Aged mice have significantly elevated levels of IL-6 in early stages of carcinogenesis compared to young mice.** Mice were administered with 4-NQO for 12 weeks and tongue cells were re-stimulated with PMA/Ionomycin for 4 hours before supernatants from these cultures were used for IL-6 ELISA.

**Fig.S6**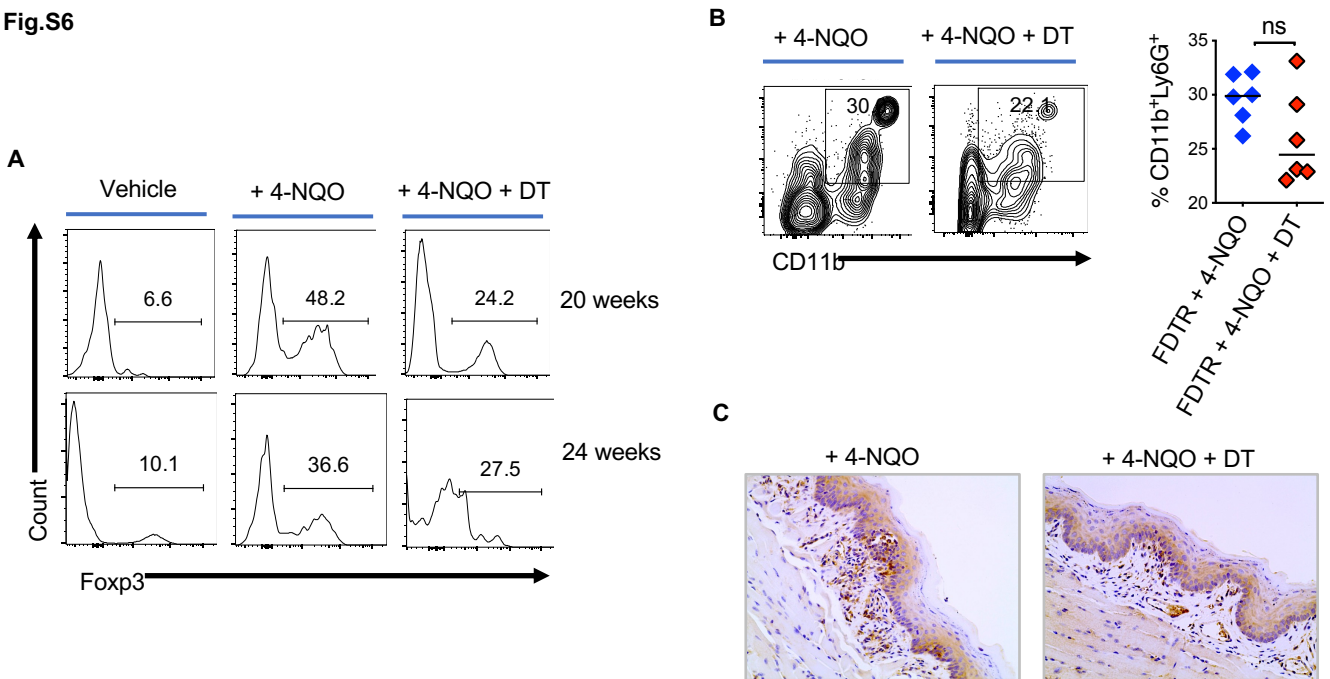

**Fig.S6. Partial T<sub>reg</sub> depletion does not affect IL-1 $\beta$  and MDSC proportions.** T<sub>regs</sub> were depleted in FDTR mice by injecting diphtheria toxin (DT) every 5 days between 16<sup>th</sup> -21<sup>st</sup> weeks of 4-NQO treatment. Flow cytometry contour plots showing CD4<sup>+</sup>Foxp3<sup>+</sup> cells (A) and MDSC (B, left). Statistical analysis of MDSC proportions (18 weeks) (B, right). (C) IL-1 $\beta$  immunohistochemistry staining and microscopy were performed at 18 weeks of 4-NQO administration (400X magnification).

**Fig.S7**

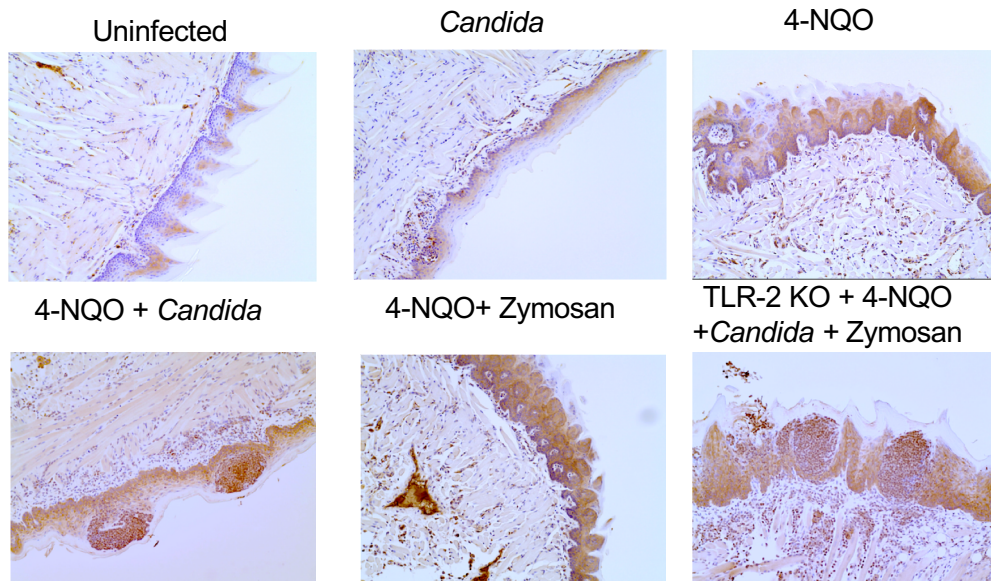

**Fig.S7. *Candida* and Zymosan increase IL-1 $\beta$  expression in tongue during 4-NQO induced carcinogenesis.** 4-NQO was administered in WT or TLR-2 KO C57BL/6 mice (6 mice/group). Zymosan (1mg) or *Candida* ( $10^7$  blastospores) were applied sublingually under anesthesia every week between 4<sup>th</sup> and 8<sup>th</sup> weeks of 4-NQO administration. IL-1 $\beta$  immunohistochemistry staining and microscopy were performed at 12 weeks (200X magnification).

**Fig.S8**

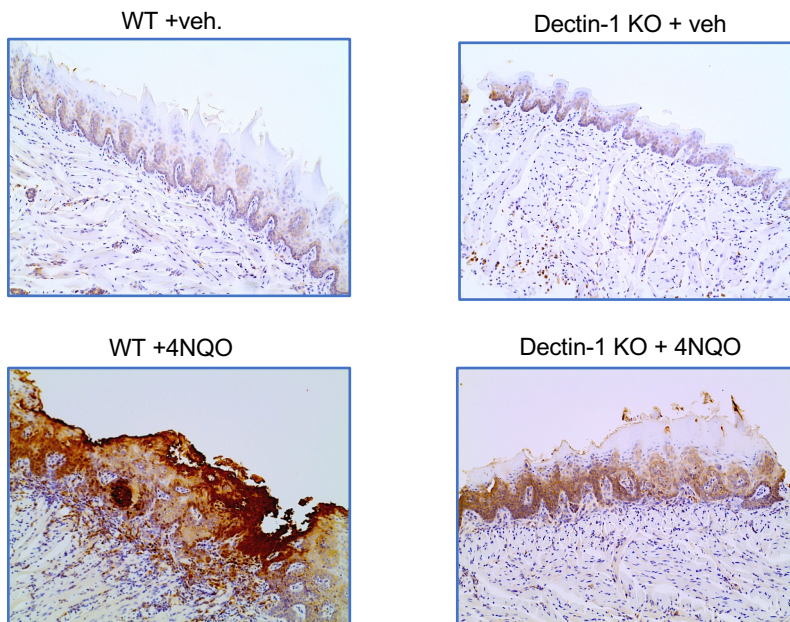

**Fig.S8. Dectin-1 deficiency reduces IL-1 $\beta$  expression in tongue during 4-NQO induced carcinogenesis.** Tongue tissues were processed for immunohistochemistry (IHC) and flow cytometry at 23 weeks after 4-NQO administration (200X magnification).

Fig.S9

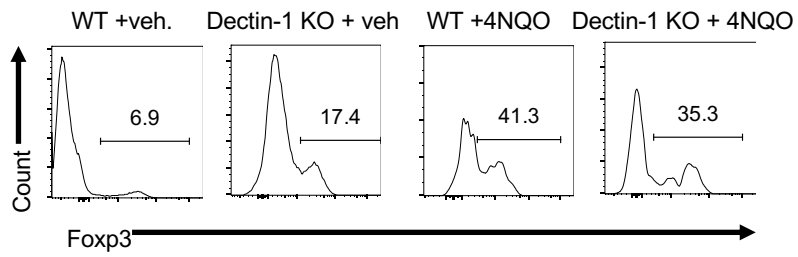

**Fig.S9. 4-NQO carcinogenesis induced T<sub>reg</sub> infiltration in tongue is significantly reduced with loss of Dectin-1.** Flow cytometry contour plots showing CD4<sup>+</sup>Foxp3<sup>+</sup> cells, 23 weeks after 4-NQO administration.
